# Supplementary material for: Computational Identification of Potential Anti-Inflammatory Natural Compounds Targeting the p38 Mitogen-Activated Protein Kinase (MAPK): Implications for COVID-19-Induced Cytokine Storm
Source: Biomolecules. 2021 Apr 29;11(5):653. doi: 10.3390/biom11050653 (PMC8146027; doi:10.3390/biom11050653)
Supplement: Supplementary file 1 [file biomolecules-11-00653-s001.zip › biomolecules-1145090-supplementary.pdf]

*Supplementary Materials*

# Computational Identification of Potential Anti-Inflammatory Natural Compounds Targeting the p38 Mitogen-Activated Protein kinase (MAPK): Implications for COVID-19-Induced Cytokine Storm

Seth O. Asiedu <sup>1</sup>, Samuel K. Kwofie <sup>2,3,\*</sup>, Emmanuel Broni <sup>2</sup> and Michael D. Wilson <sup>1,4</sup>

<sup>1</sup> Department of Parasitology, Noguchi Memorial Institute for Medical Research, College of Health Sciences, University of Ghana, Legon, Accra, Ghana; soasiedu@noguchi.ug.edu.gh (S.O.A); MWilson@noguchi.ug.edu.gh (M.D.W)

<sup>2</sup> Department of Biomedical Engineering, School of Engineering Sciences, College of Basic and Applied Sciences, University of Ghana, Legon, Accra, Ghana; ebron002@st.ug.edu.gh

<sup>3</sup> West African Centre for Cell Biology of Infectious Pathogens, Department of Biochemistry, Cell and Molecular Biology, College of Basic and Applied Sciences, University of Ghana, Accra, Ghana

<sup>4</sup> Department of Medicine, Loyola University Medical Center, Maywood, IL 60153, USA

\* Correspondence: skkwofie@ug.edu.gh

**Citation:** Asiedu, S.O.; Kwofie, S.K.; Broni, E.; Wilson, M.D.

Computational Identification of Potential Anti-Inflammatory Natural Compounds Targeting the p38 Mitogen-Activated Protein kinase (MAPK): Implications for COVID-19-Induced Cytokine Storm.

*Biomolecules* **2021**, *11*, 653.

<https://doi.org/10.3390/biom11050653>

Academic Editor: José L. Medina-Franco

Received: 27 February 2021

Accepted: 26 April 2021

Published: 29 April 2021

**Publisher's Note:** MDPI stays neutral with regard to jurisdictional claims in published maps and institutional affiliations.

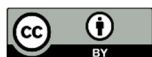

**Copyright:** © 2021 by the authors. Submitted for possible open access publication under the terms and conditions of the Creative Commons Attribution (CC BY) license (<http://creativecommons.org/licenses/by/4.0/>).

**Table S1.** Predicted pharmacokinetics of the 18 selected hits and two inhibitors. The profiles used were gastrointestinal (GI) absorption, cytochrome P450 (CYP) 3A4 and permeability glycoprotein (P-gp) substrates. Also included is the number of violations of Lipinski's rule of five.

| Name         | GI absorption | Pgp substrate | CYP3A4 inhibitor | Lipinski #violations |
|--------------|---------------|---------------|------------------|----------------------|
| ZINC95486106 | High          | No            | No               | 1                    |
| ZINC95913720 | High          | No            | No               | 0                    |
| ZINC33832090 | High          | No            | No               | 1                    |
| ZINC95919076 | High          | No            | No               | 1                    |
| ZINC1691180  | High          | No            | No               | 1                    |
| ZINC5519433  | High          | No            | No               | 0                    |
| ZINC4520996  | High          | No            | No               | 1                    |
| ZINC1531907  | High          | No            | No               | 0                    |
| ZINC4098804  | High          | No            | No               | 0                    |
| ZINC95919075 | High          | No            | No               | 1                    |
| ZINC13302897 | High          | No            | No               | 1                    |
| ZINC4215683  | High          | No            | No               | 0                    |
| ZINC13302884 | High          | No            | No               | 1                    |
| ZINC13302890 | High          | No            | No               | 1                    |
| ZINC4023706  | High          | No            | No               | 1                    |
| ZINC5733756  | High          | No            | No               | 1                    |
| ZINC70454959 | High          | No            | No               | 0                    |
| ZINC85993836 | High          | No            | No               | 1                    |
| SB 202190    | High          | Yes           | Yes              | 0                    |
| SB 203580    | High          | Yes           | Yes              | 0                    |

**Table S2.** Predicted inhibitory constants (Ki) and binding energy the selected compounds and those of the known inhibitors. Also, included are the experimentally determined inhibition constants of known inhibitors.

| Known Inhibitors used in this study |                           |                                                    |                                   |                |
|-------------------------------------|---------------------------|----------------------------------------------------|-----------------------------------|----------------|
| Name                                | Binding energy (kcal/mol) | Inhibitory constant (Ki) based on binding energies | Experimental Inhibitory Constants | PubMedID       |
| SB 202190                           | -11                       | 8.63 nM                                            | 40 nM (IC <sub>50</sub> )         | PMID: 9207191  |
| SB 203580                           | -10.9                     | 10.22 nM                                           | 41.2 nM (IC <sub>50</sub> )       | PMID: 9207191  |
| Doramapimod                         | -9.9                      | 55.27 nM                                           | 7.1 nM (IC <sub>50</sub> )        | PMID: 26279429 |
| Skepinone-L                         | -9.8                      | 65.44 nM                                           | 5 nM (IC <sub>50</sub> )          | PMID: 22198732 |
| ARRY-797                            | -9.5                      | 108.58 nM                                          | 4.5 nM (IC <sub>50</sub> )        | PMID: 19950901 |
| Losmapimod                          | -9.3                      | 152.18 nM                                          | 8.1 (pKi)                         | PMID: 19950901 |
| SCIO 469                            | -9.1                      | 213.29 nM                                          | 9 nM (IC <sub>50</sub> )          | PMID: 19950901 |
| PH-797804                           | -8.4                      | 695.22 nM                                          | 26 nM (IC <sub>50</sub> )         | PMID: 19720877 |
| VX-702                              | -8.4                      | 695.22 nM                                          | 3.7 nM (K <sub>D</sub> )          | PMID: 19950901 |
| Pamapimod                           | -8.2                      | 974.41 nM                                          | 16 nM (IC <sub>50</sub> )         | PMID: 26279429 |
| Dilmapimod                          | -7.9                      | 1616.83 nM                                         | -                                 | PMID: 19950901 |
| Selected leads                      |                           |                                                    |                                   |                |
| Name                                | Binding energy (kcal/mol) | Predicted Ki                                       |                                   |                |
| ZINC95486106                        | -12.1                     | 1.348 nM                                           |                                   |                |
| ZINC1691180                         | -11.6                     | 3.135 nM                                           |                                   |                |
| ZINC5519433                         | -11.6                     | 3.135 nM                                           |                                   |                |
| ZINC4520996                         | -11.6                     | 3.135 nM                                           |                                   |                |
| ZINC5733756                         | -11.1                     | 7.291 nM                                           |                                   |                |

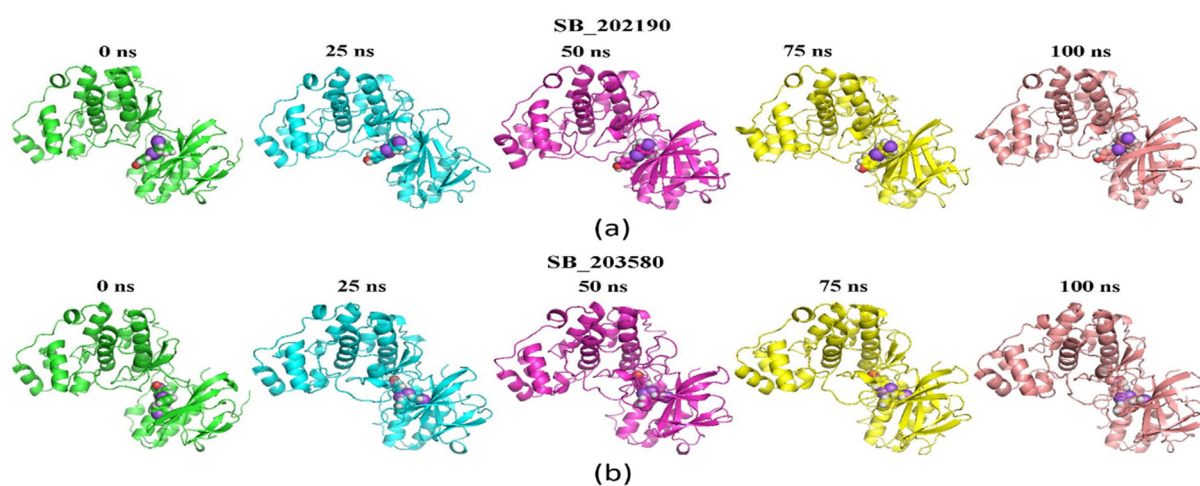

**Figure S1.** Snapshots at 25 ns interval (time step = 0, 25, 50, 75 and 100 ns) for the binding modes of the (a) SB 202190, and (b) SB 203580 ligand-p38 MAPK complexes.

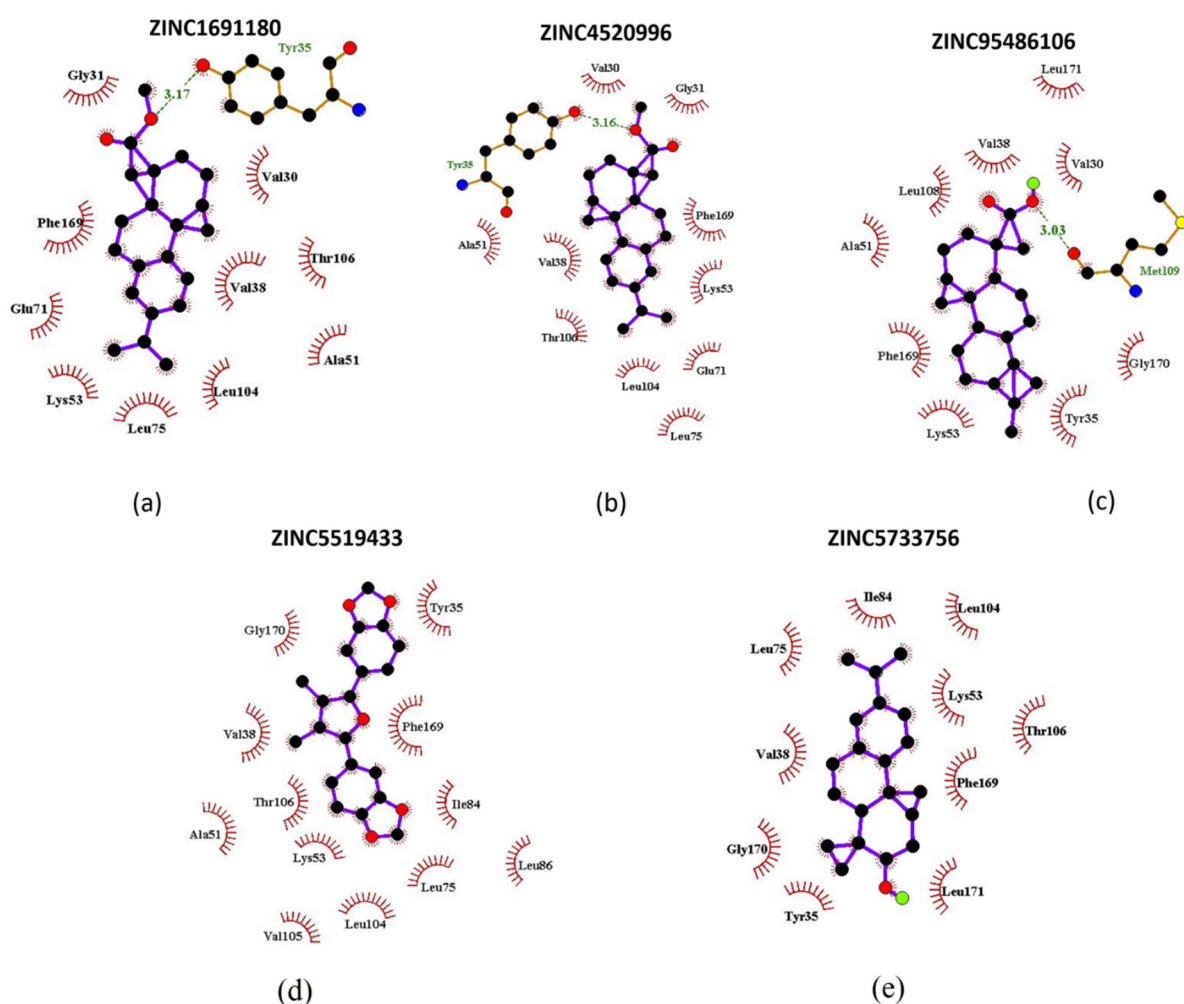

**Figure S2.** 2D representation of the protein-ligand complexes before MD for (a) ZINC1691180, (b) ZINC4520996, (c) ZINC95486106, (d) ZINC5519433, and (e) ZINC5733756-p38 MAPK complexes.

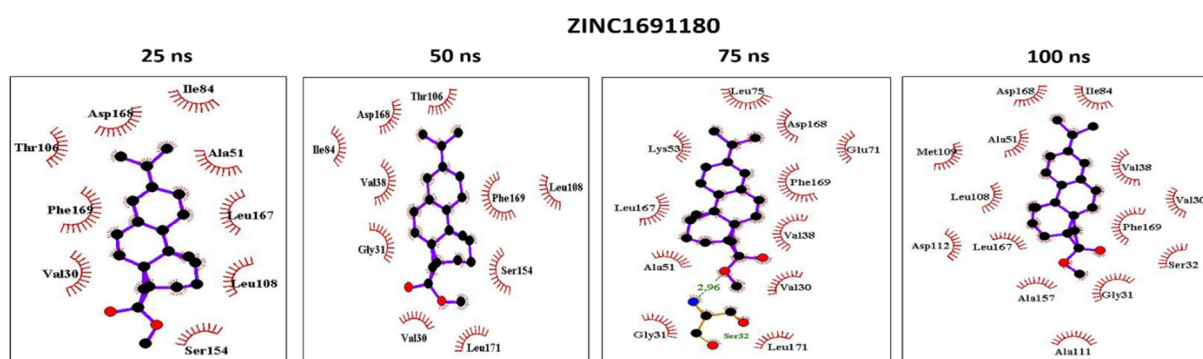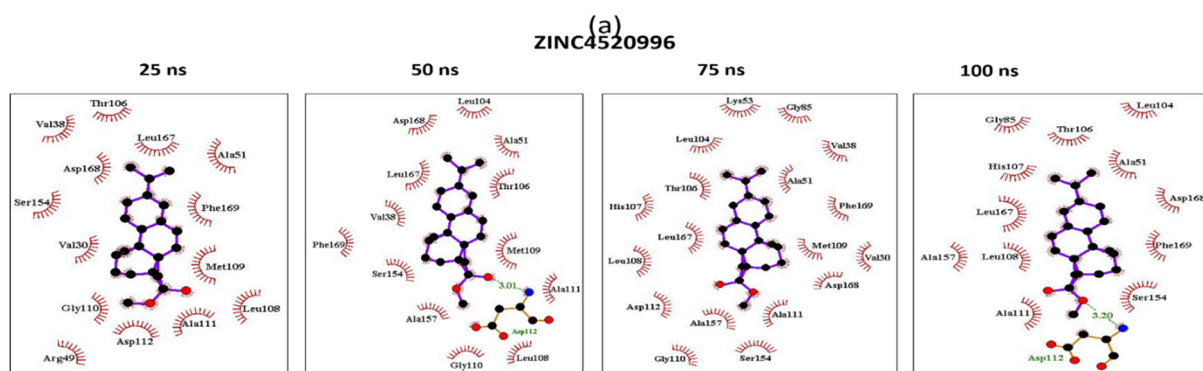

(b)

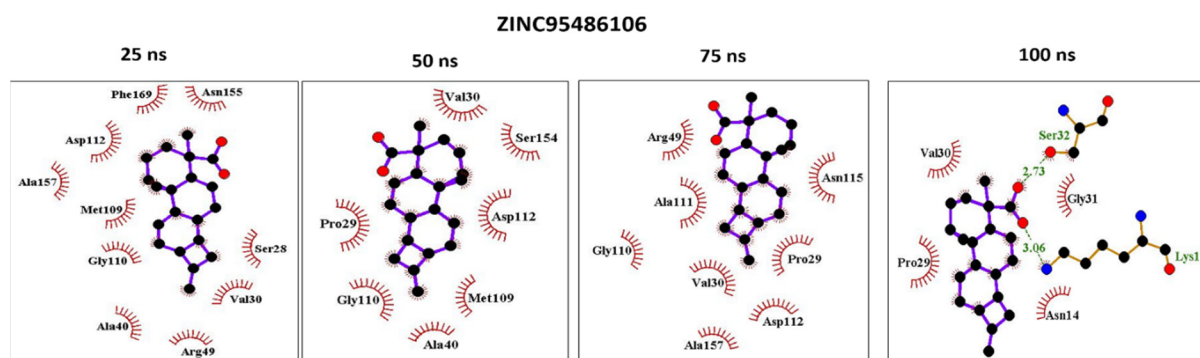

(c)

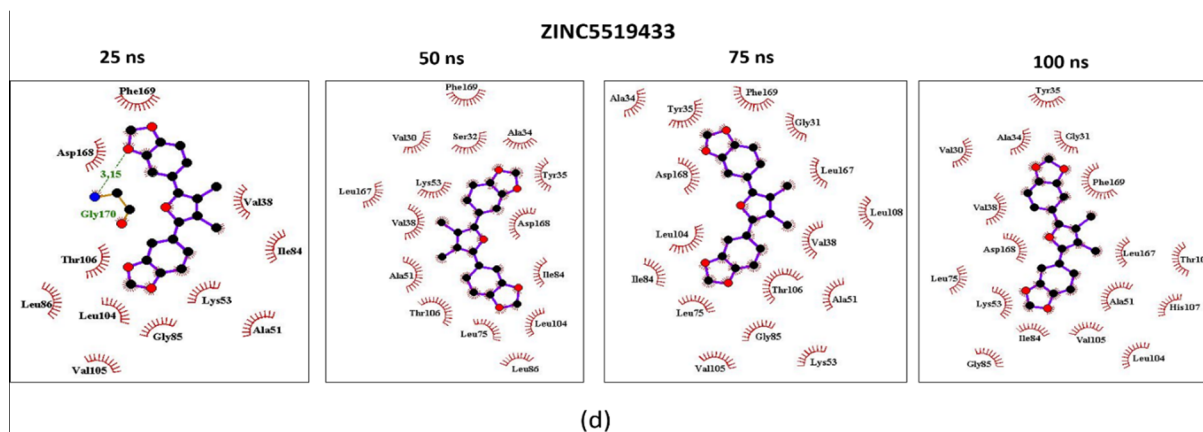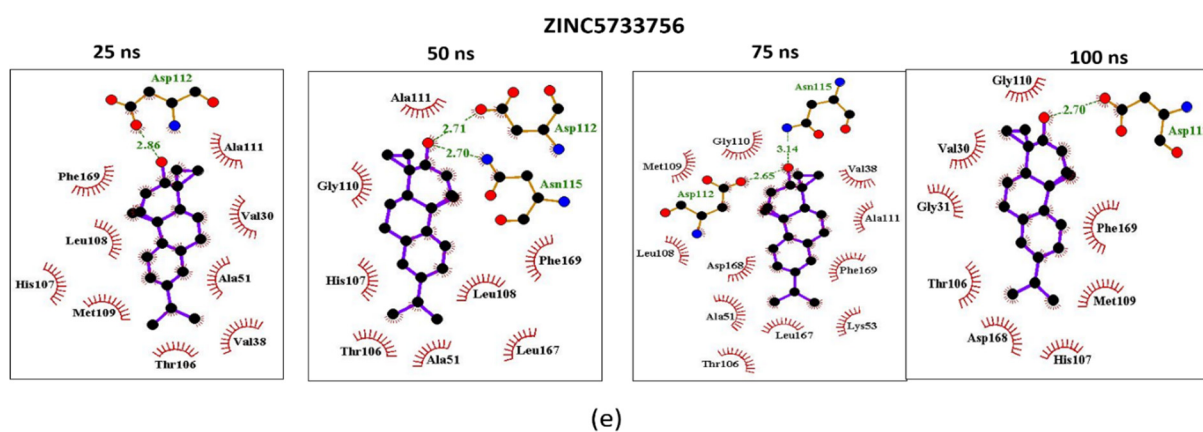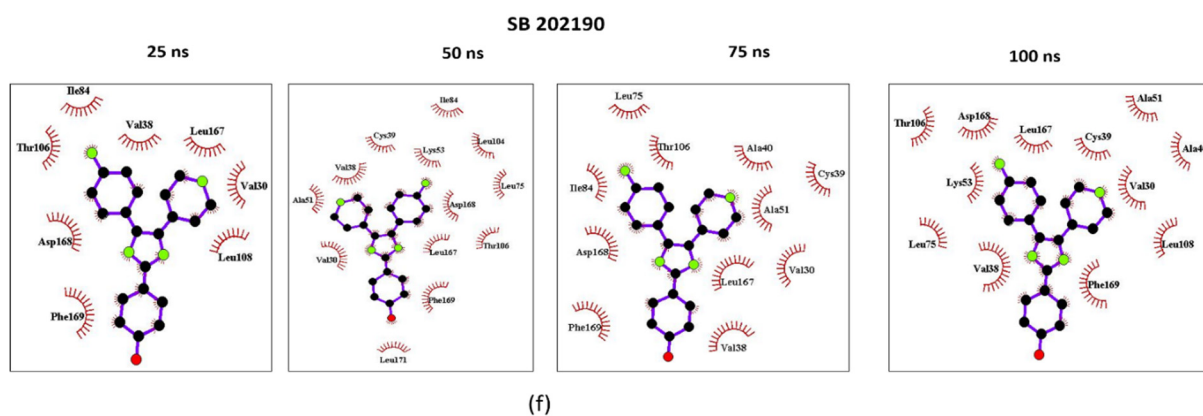

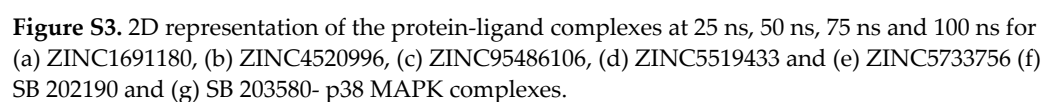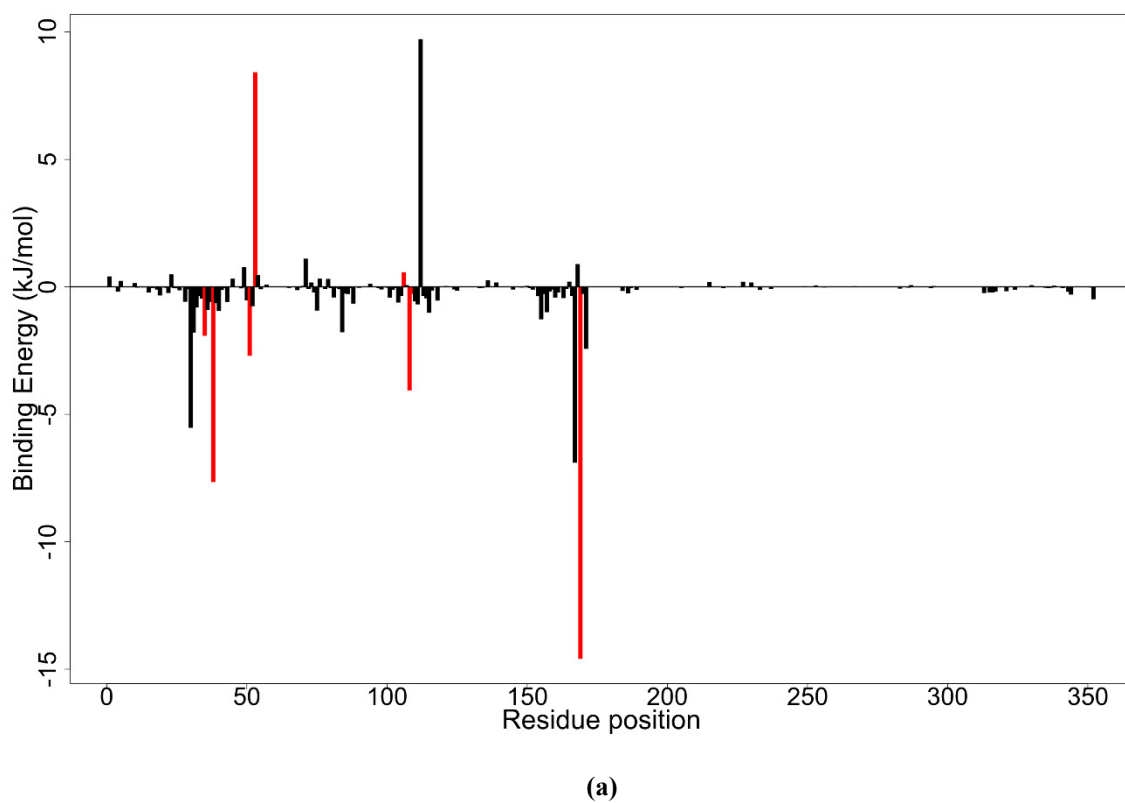

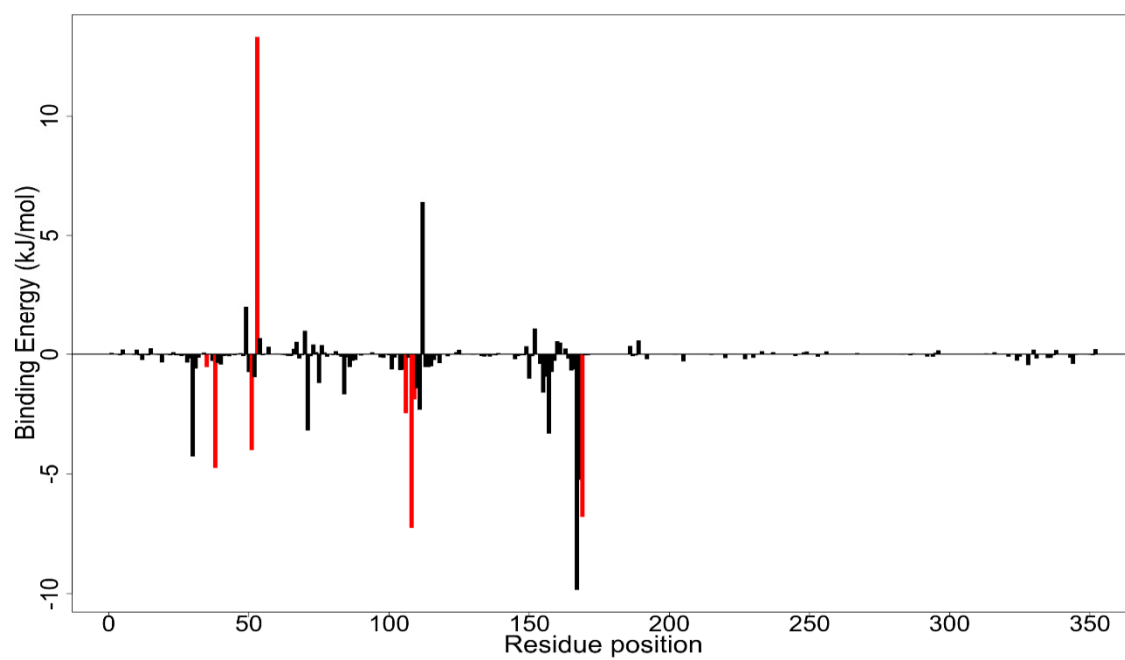

(b)

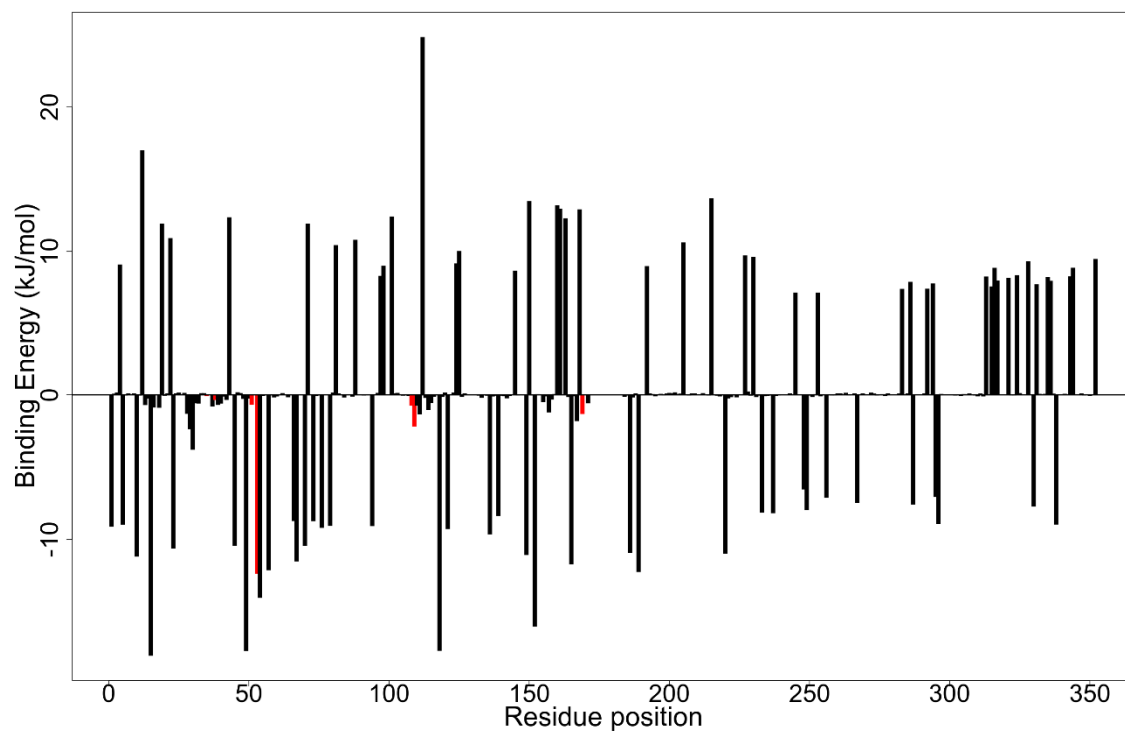

(c)

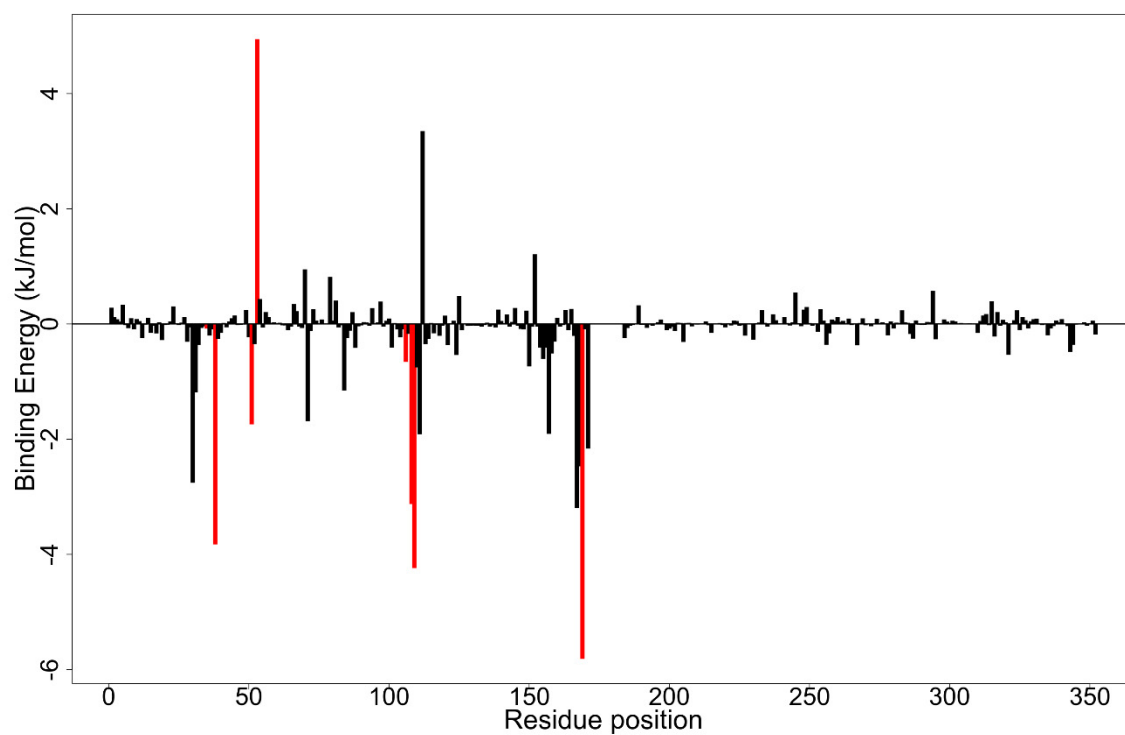

(d)

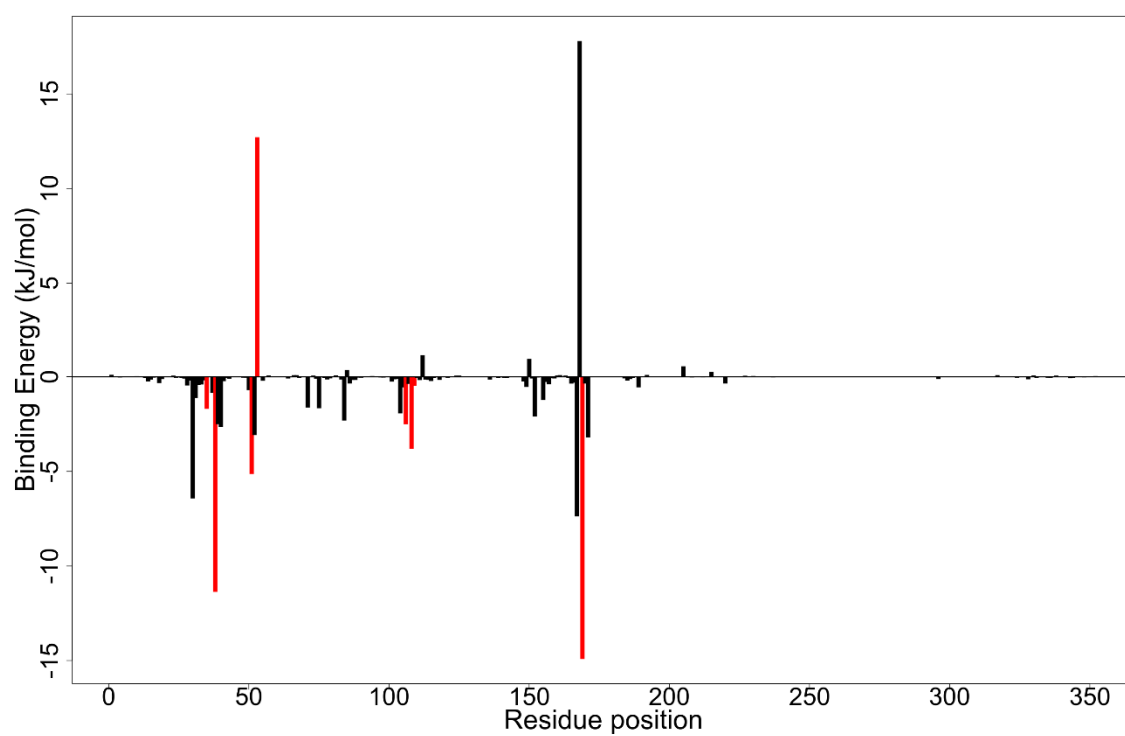

(e)

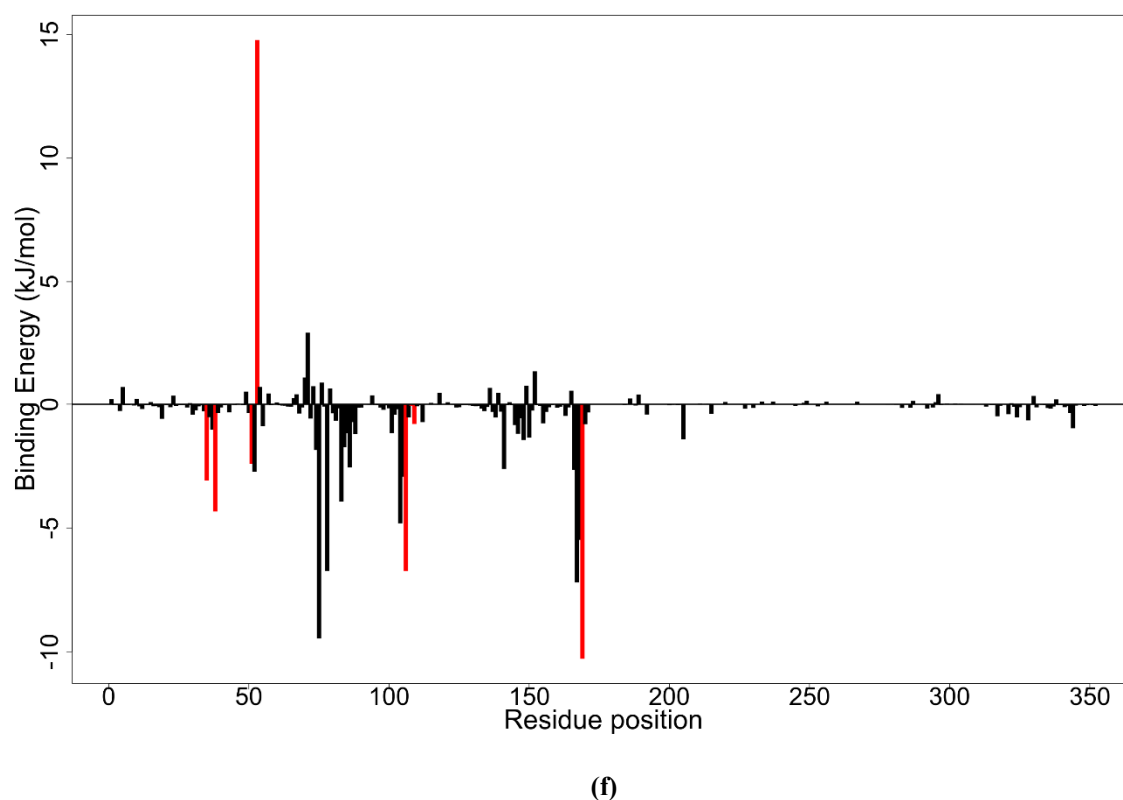

**Figure S4.** Molecular mechanics Poisson-Boltzmann surface area (MM-PBSA) plot of binding free energy contribution per-residue for (a) ZINC1691180, (b) ZINC4520996, (c) ZINC95486106, (d) ZINC5733756, (e) SB 202190, and (f) SB 203580-p38 MAPK complexes. Fluctuations of the residues Tyr35, Val38, Ala51, Lys53, Thr106, Leu108, Met109 and Phe169 are coloured red.
